# Supplementary material
Source: HighWire-hosted journal article supplement (https://bmjopen.bmj.com/content/8/9/e025857)

### Supplementary File 3 – Form for Clinical counts of naevi $\geq 2\text{mm}$ and $\geq 5\text{mm}$

MyM Record ID:

MyM participant name:

Date:

Please count all naevi over 2 mm per body site:

Please count all naevi over 5 mm per body site:

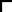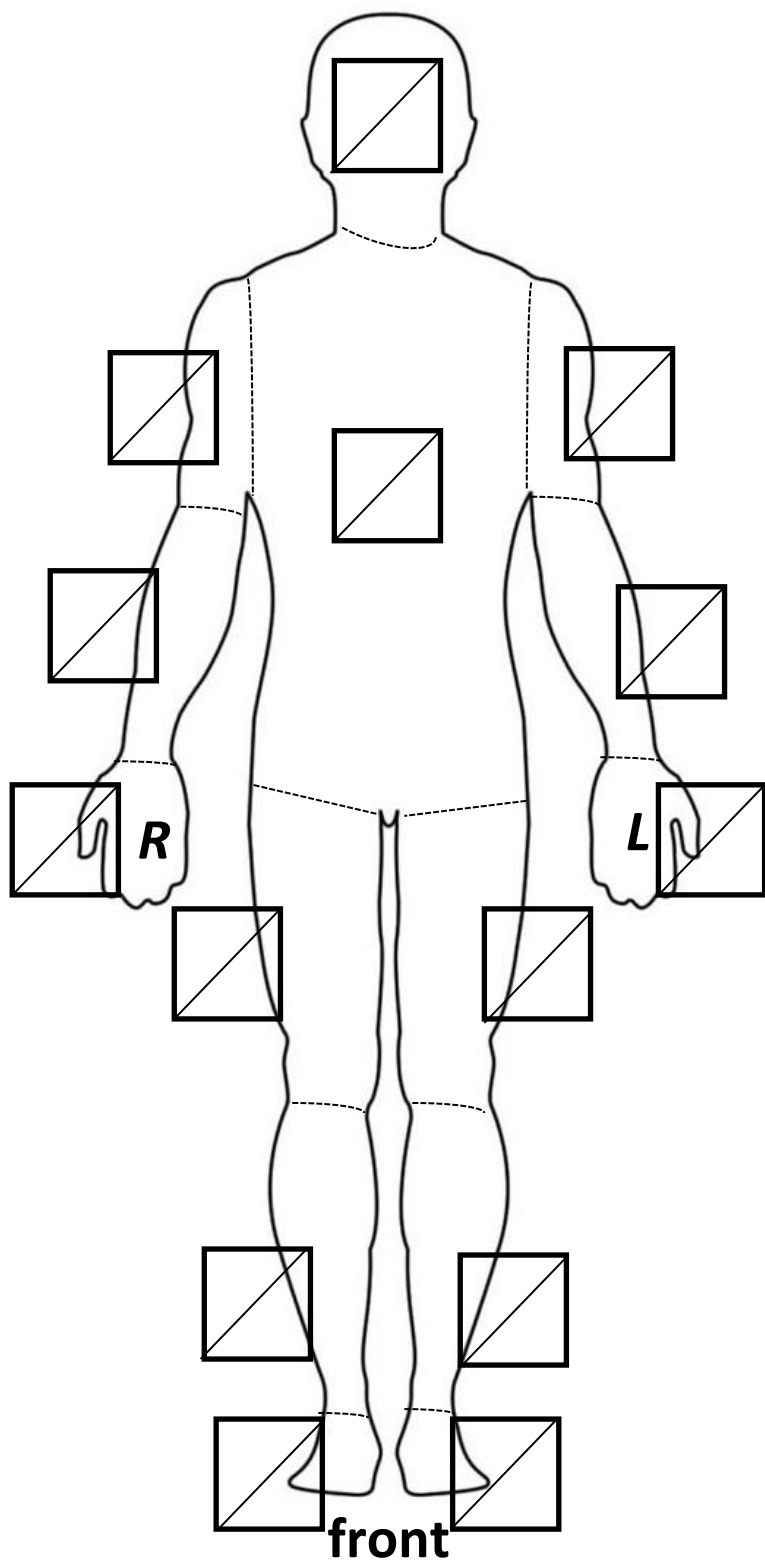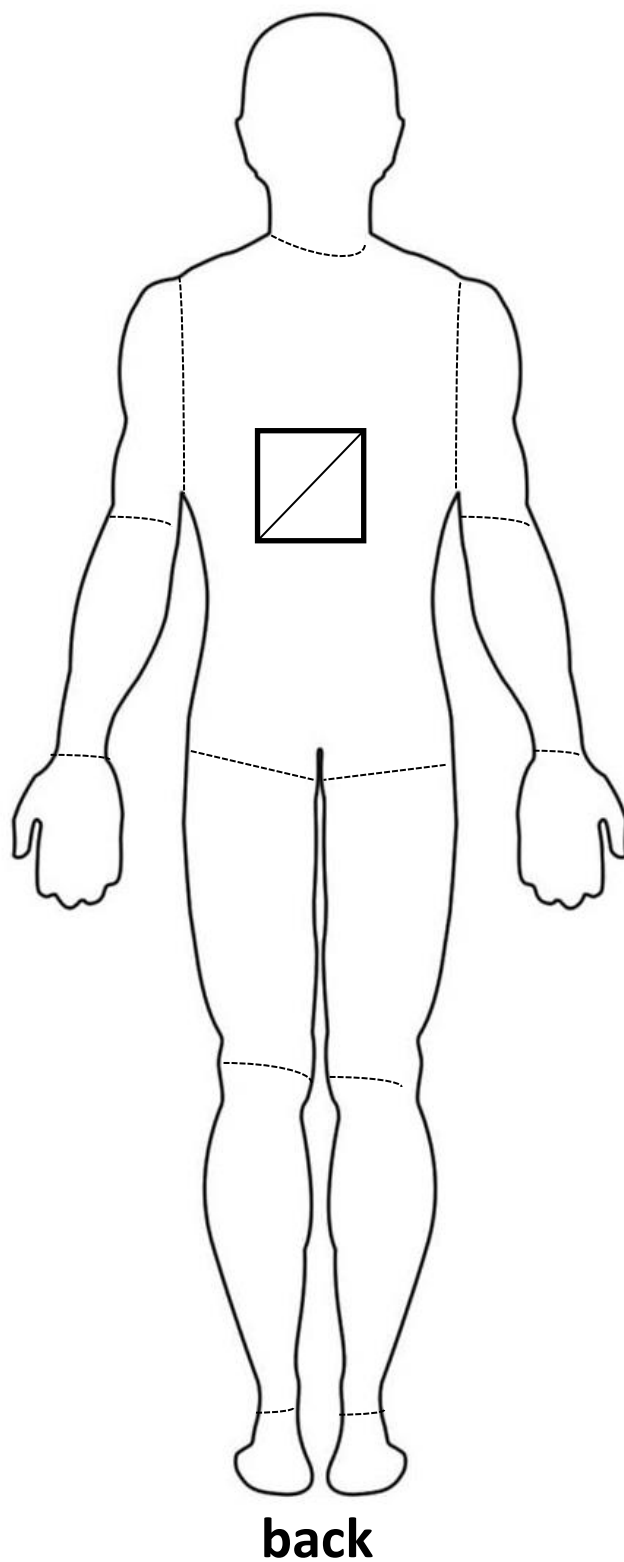

Supplement: inline-supplementary-material-1 [file inline-supplementary-material-1.pdf]
